# Supplementary material for: Functional NK Cell Activation by Ovalbumin Immunization with a Monophosphoryl Lipid A and Poly I:C Combination Adjuvant Promoted Dendritic Cell Maturation
Source: Vaccines (Basel). 2021 Sep 23;9(10):1061. doi: 10.3390/vaccines9101061 (PMC8540815; doi:10.3390/vaccines9101061)
Supplement: Supplementary file 1 [file vaccines-09-01061-s001.zip › vaccines-1365424-supplementary.pdf]

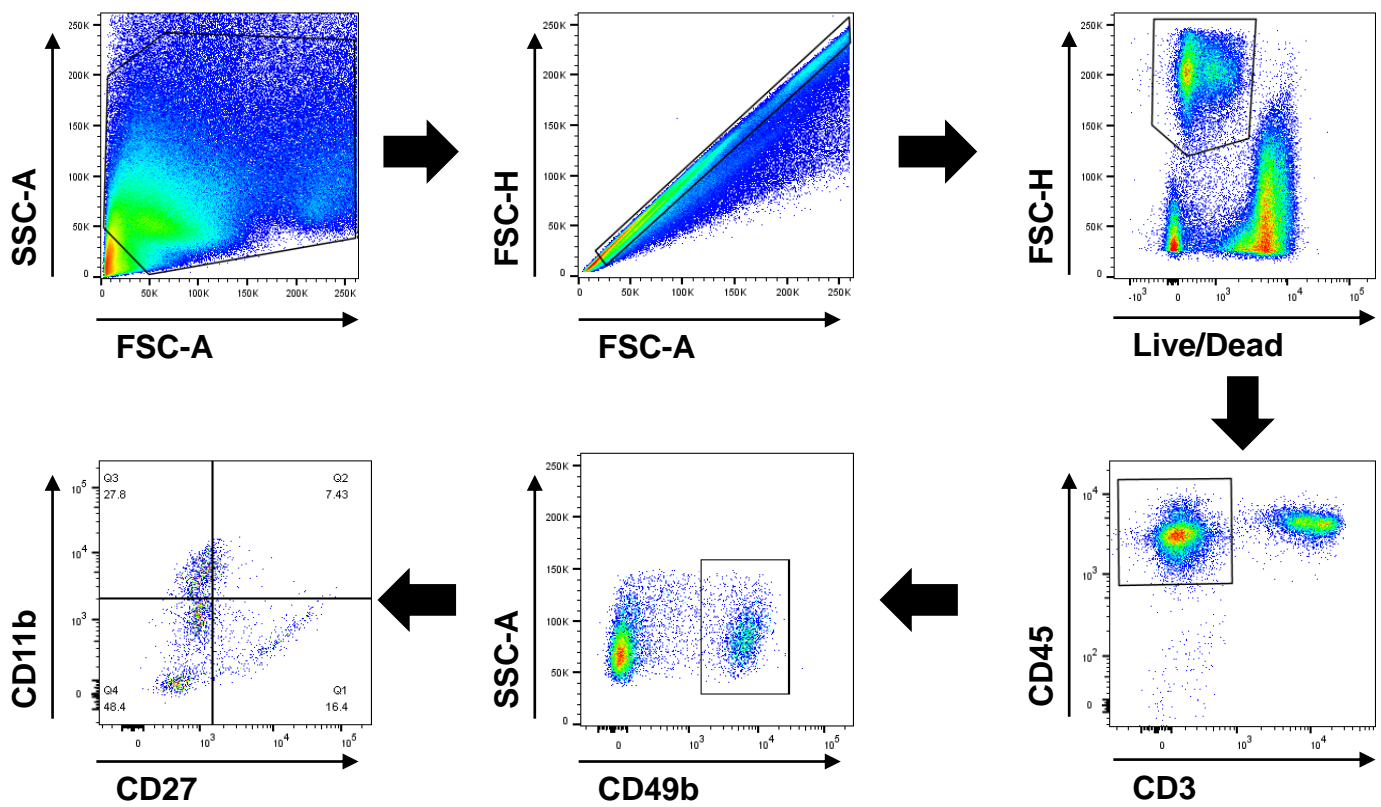

**Supplementary Figure S1. Flow cytometry gating strategy.** Gating strategy of NK cells (CD45<sup>+</sup>CD3<sup>-</sup>CD49b<sup>+</sup>) and NK cell subsets by CD27 and CD11b expressions.

### A. Spleen cell

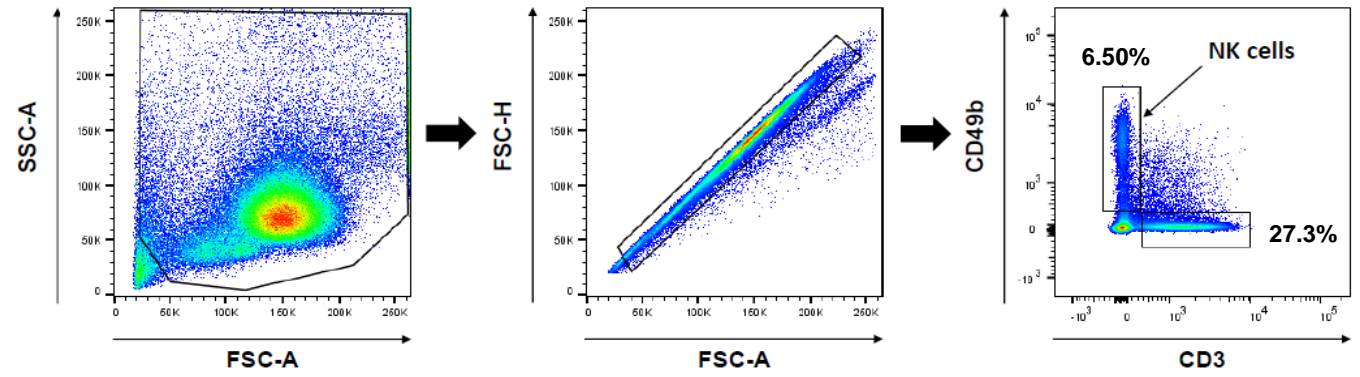

### B. Purified NK cells

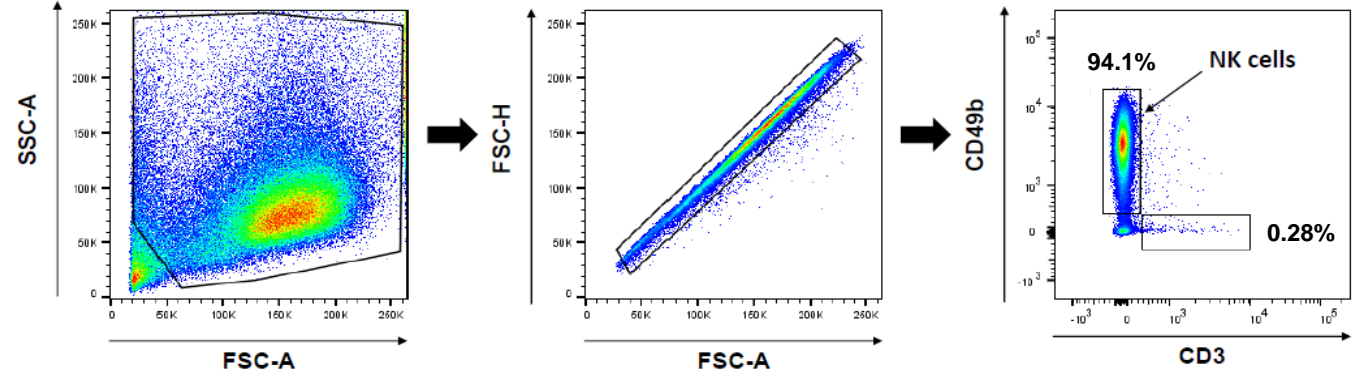

**Supplementary Figure S2. NK cell purity after NK isolation by negative selection.** NK cells (CD3<sup>+</sup>CD49b<sup>+</sup>) and T cell (CD3<sup>+</sup>CD49b<sup>-</sup>) percentages in total spleen cells (**A**) and after NK isolation (**B**) were shown.

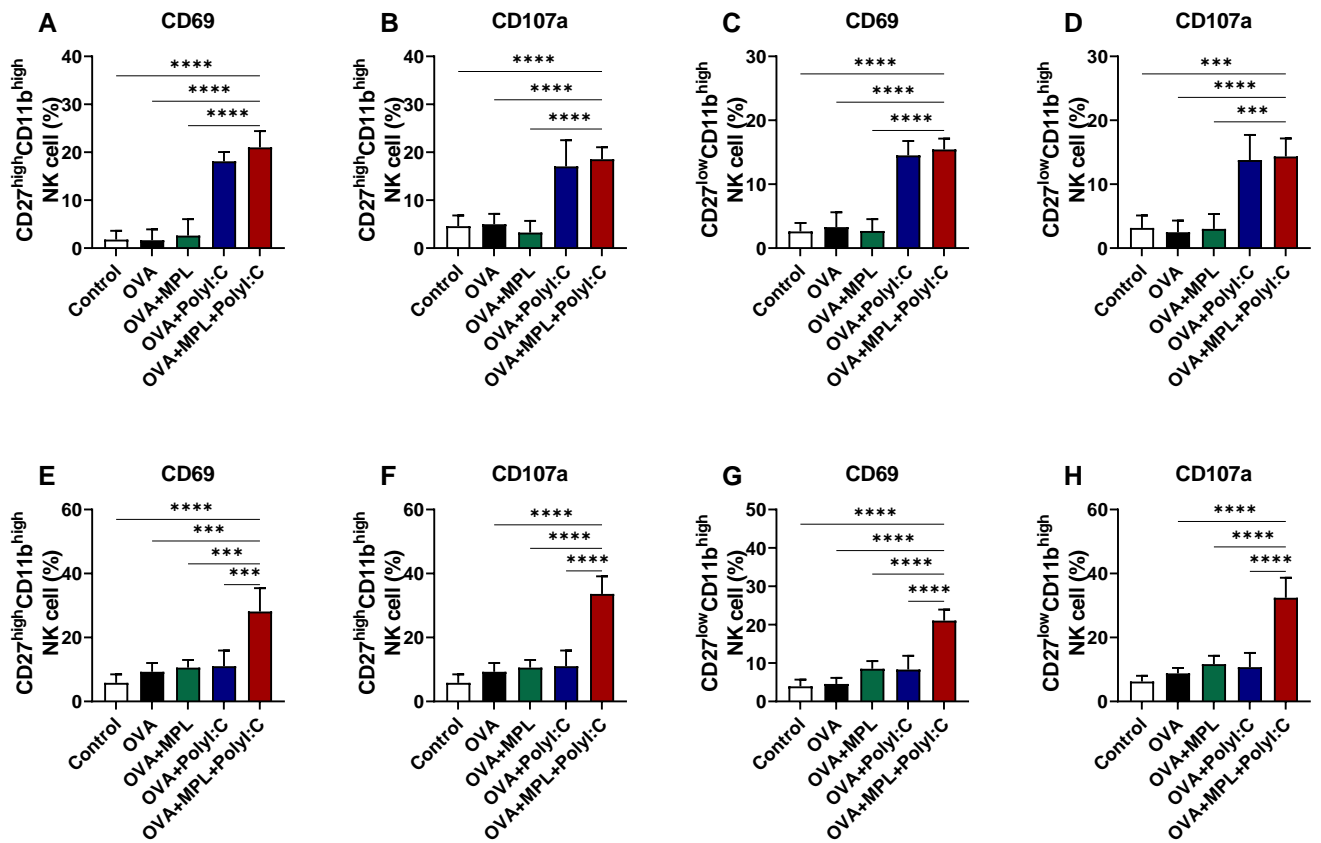

**Supplementary Figure S3. Activation marker expression levels on the mature NK cell populations in lung after intranasal immunizations of OVA with adjuvants.** Lung samples were harvested at day 1 post prime and boost vaccinations. The matured NK cells were gated as CD27<sup>high</sup>CD11b<sup>high</sup> or CD27<sup>low</sup>CD11b<sup>high</sup> from CD45<sup>+</sup>CD3<sup>+</sup>CD49b<sup>+</sup> total NK cells. Activation marker expressions by mature NK cells after the prime immunization (**A-D**), and After the boost immunization (**E-H**) were shown in the mean  $\pm$  SD. Statistical analysis between groups were performed by One-way ANOVA and Tukey's multiple comparison test. \*\*\*,  $p < 0.0002$  and \*\*\*\*,  $p < 0.0001$ .

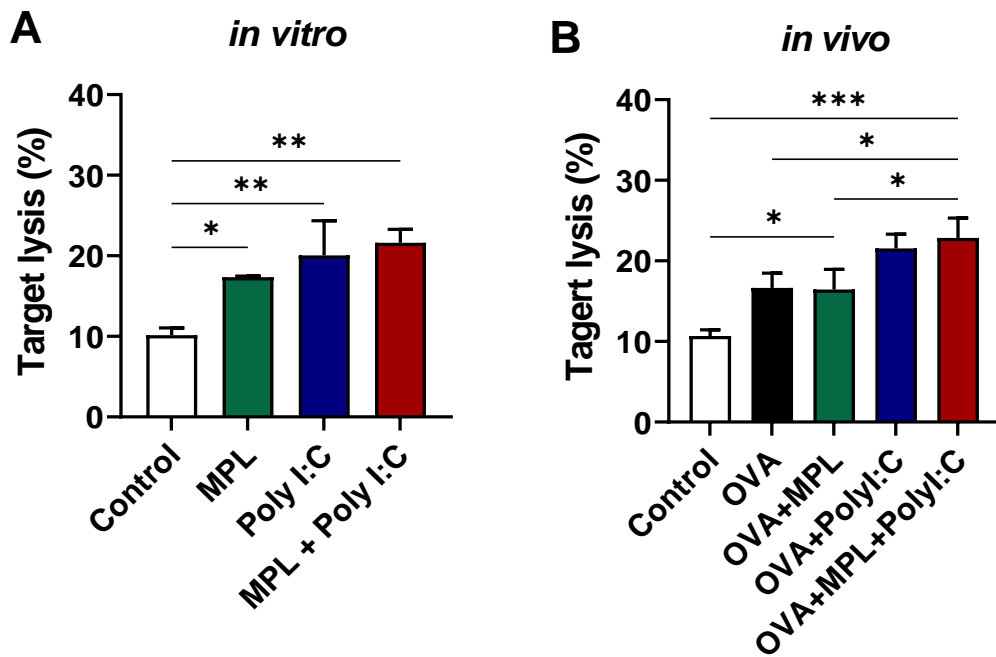

**Supplementary Figure S4. Cytotoxicity mediated by NK cells after *in vitro* adjuvant treatment and *in vivo* immunizations with OVA+adjuvants. (A)** NK cells were isolated from spleen cells of naïve mice and then treated with MPL, Poly I:C, and MPL+PolyI:C for 2 days. **(B)** NK cells were isolated from spleen cells of naïve or immunized mice at day 1 post boost immunization. The effector cells (E), *in vitro* adjuvant pre-treated-NK cells and the *in vivo* isolated-NK cell from the immunized mice, were stained with 2000 nM carboxyfluorescein succinimidyl ester (CFSE) and then cultured with target cells (T), YAC-1 cells, with a ratio of 5 (E) : 1 (T). Cells were collected after 4-hour incubation and the dead cell frequencies of target cells (CFSE-7-AAD<sup>+</sup> YAC-1 cells) were determined by flow cytometry. The data show the mean  $\pm$  SD. Statistical analysis between groups were performed by One-way ANOVA and Tukey's multiple comparison test. \*,  $p < 0.0332$ , \*\*,  $p < 0.0021$ , and \*\*\*,  $p < 0.0002$ .

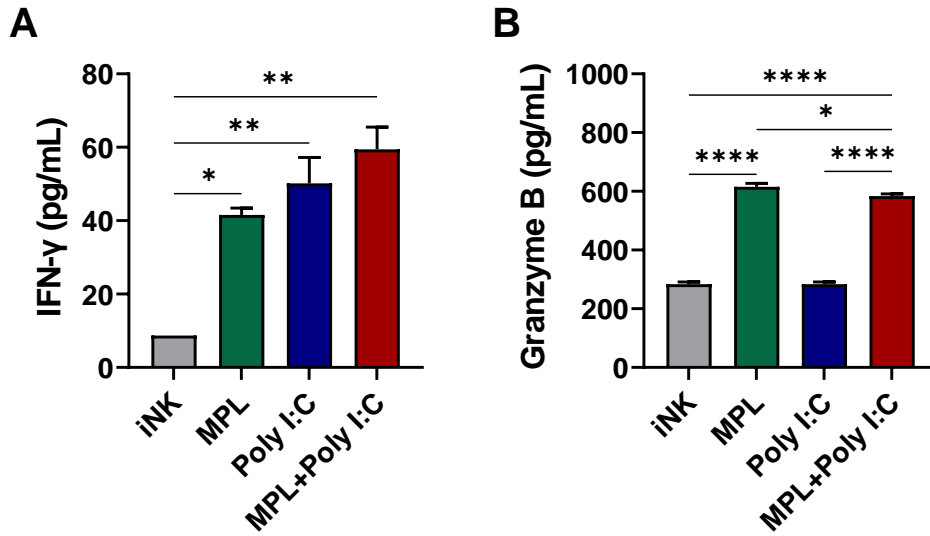

**Supplementary Figure S5. Cytokine production by isolated NK cells after *in vitro* adjuvant treatment.** NK cells were isolated from naïve spleen cells and treated with MPL (100 ng/ml), Poly I:C (1000 ng/ml), or MPL+PolyI:C (100 ng/ml + 1000 ng/ml) for 2 days. The levels of IFN- $\gamma$  and granzyme B in the culture supernatants were measured by ELISA. The data were shown in mean  $\pm$  SD. Statistical comparisons between groups were performed in One-way ANOVA and Tukey's multiple comparison test. \*, 0.0332, \*\*, 0.0021, and \*\*\*\*, 0.0001.

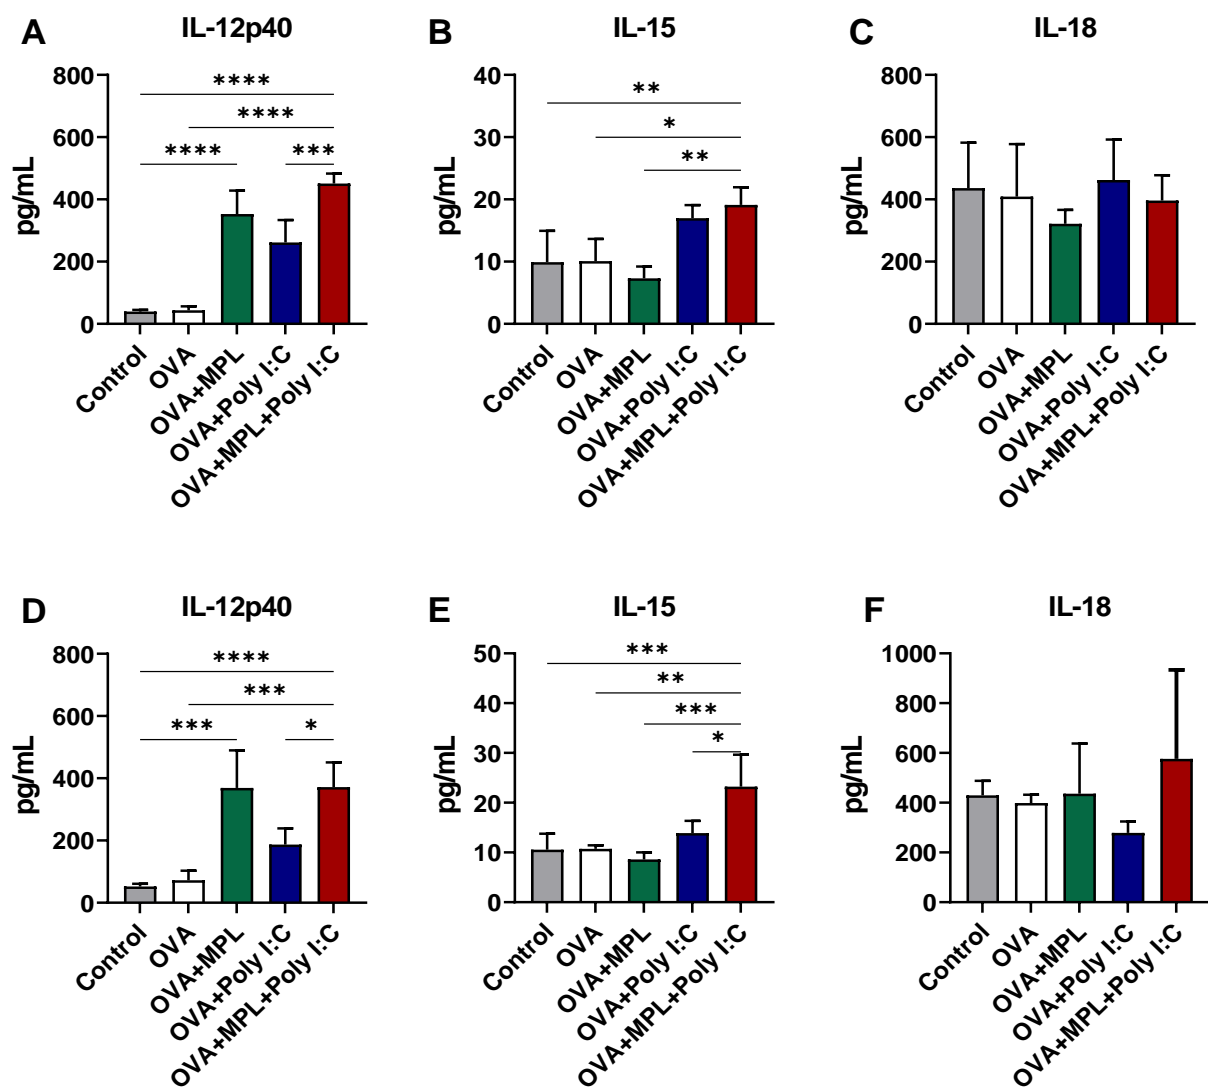

**Supplementary Figure S6. Induction of cytokine production after stimulation by MPL and Poly I:C in the lungs of C57BL/6 mice at prime and boost dose.** Lung homogenates were collected at day 1 post prime (A-C) and boost (D-F) immunizations and the levels of IL-12p40, IL-15 and IL-18 were measured by ELISA. The data were shown in mean  $\pm$  SD (n=5). Statistical comparisons between groups were performed in One-way ANOVA and Tukey's multiple comparison test. \*, 0.0332, \*\*, 0.0021, \*\*\*, 0.0002 and \*\*\*\*, 0.0001.
